# Supplementary material for: Structural Insights of Shigella Translocator IpaB and Its Chaperone IpgC in Solution
Source: PubMed Central journal article supplement (PMC8117225; doi:10.3389/fcimb.2021.673122), 2021-04-29
Supplement: DataSheet_1.pdf [file DataSheet_1.pdf]

## *Supplementary Material*

### Supplementary Figures and Tables

#### 1. Supplementary Figures

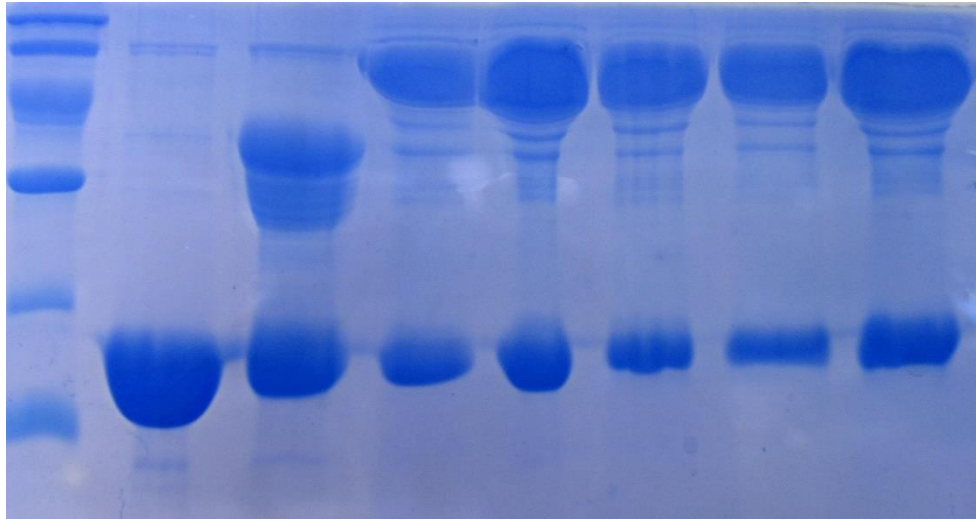

**Supplementary Figure 1.** SDS-PAGE analysis of the samples used in the SAXS experiments after returning to the home laboratory. From left to right: 1) LMW marker (GE Healthcare): 98 kDa, 69 kDa, 45 kDa, 30 kDa, 20.1 kDa, 14.4 kDa, 2) IpgC, 3) IpgC with IpaB Nter, 4 – 8) IpgC with full length IpaB.



## 2. Supplementary Tables

| Calc. Mass | Obsrv. Mass | $\pm$ da | $\pm$ ppm | Start Seq. | End Seq. | Sequence               | Ion Score | C. I. % |
|------------|-------------|----------|-----------|------------|----------|------------------------|-----------|---------|
| 872,4948   | 872,5002    | 0,0054   | 6         | 158        | 164      | INQIQTR                |           |         |
| 1167,5641  | 1167,569    | 0,0045   | 4         | 290        | 299      | SDEYAAEVRK             |           |         |
| 1196,6633  | 1196,604    | -0,0591  | -49       | 425        | 436      | QAAAKLAENIGK           |           |         |
| 1329,7737  | 1329,772    | -0,0018  | -1        | 178        | 188      | LSREEIQLTIK            | 51        | 99,765  |
| 1329,7737  | 1329,772    | -0,0018  | -1        | 178        | 188      | LSREEIQLTIK            |           |         |
| 1446,7799  | 1446,779    | -0,0012  | -1        | 123        | 135      | INTLLSETEGLTR          | 109       | 100     |
| 1446,7799  | 1446,779    | -0,0012  | -1        | 123        | 135      | INTLLSETEGLTR          |           |         |
| 1520,7704  | 1520,768    | -0,0022  | -1        | 270        | 282      | NDLALFQSLQESR          | 134       | 100     |
| 1520,7704  | 1520,768    | -0,0022  | -1        | 270        | 282      | NDLALFQSLQESR          |           |         |
| 1604,8101  | 1604,799    | -0,0113  | -7        | 1          | 15       | MHNVSTTTTGFPPLAK       |           |         |
| 2160,0779  | 2160,068    | -0,0098  | -5        | 16         | 36       | ILTSTELGDNTIQAANDAANK  | 135       | 100     |
| 2160,0779  | 2160,068    | -0,0098  | -5        | 16         | 36       | ILTSTELGDNTIQAANDAANK  |           |         |
| 2280,1719  | 2280,182    | 0,0102   | 4         | 116        | 135      | NLEFSDKINTLLSETEGLTR   | 149       | 100     |
| 2280,1719  | 2280,182    | 0,0102   | 4         | 116        | 135      | NLEFSDKINTLLSETEGLTR   |           |         |
| 2335,1523  | 2335,164    | 0,0118   | 5         | 263        | 282      | NNEESLKNLALFQSLQESR    | 205       | 100     |
| 2335,1523  | 2335,164    | 0,0118   | 5         | 263        | 282      | NNEESLKNLALFQSLQESR    |           |         |
| 2371,1047  | 2371,132    | 0,0269   | 11        | 220        | 241      | EIDSFSAFSNTASAEQLSTQKK |           |         |
| 2389,1155  | 2389,108    | -0,0071  | -3        | 220        | 241      | EIDSFSAFSNTASAEQLSTQKK |           |         |
| 2392,1926  | 2392,162    | -0,031   | -13       | 546        | 567      | FGQLQEVIADLLASMSNSQANR | 11        | 0       |
| 2392,1926  | 2392,162    | -0,031   | -13       | 546        | 567      | FGQLQEVIADLLASMSNSQANR |           |         |

**Supplementary Table 1.** Mass spectrometry analysis performed on the IpaB-N band isolated from the SDS-PAGE gel of Supplementary Figure 1, lane 3. Information of the peptides detected is presented. The analysis was performed by the Mass Spec facility (ProteoPole) of Institut Pasteur.

| Model                  | Molecule    | PDB template   | PDB template residue numbers | Model residue numbers* |
|------------------------|-------------|----------------|------------------------------|------------------------|
| <i>Asymmetric IpgC</i> | IpgC        | 3GZ1           | 8-151                        | 8-151                  |
| <i>Symmetric IpgC</i>  | IpgC        | 3KS2           | 18-154                       | 18-154                 |
| <i>IpgC-IpaB dimer</i> | IpgC (AcrH) | 3KS2<br>(3WXX) | 30-154 (10-159)              | 30-154 (13-154)        |
|                        | IpaB        | 3GZ1           | 60-72                        | 60-72                  |
|                        | IpaB        | 5WKQ           | 74-239                       | 74-239                 |
|                        | IpaB (AopB) | 3WXX           | 71-263                       | 246-438                |

**Supplementary Table 2.** PDB models used for the modeling

\*The numbering of the wild type protein is employed in the table but the IpgC construct we used contains the N-terminal tag “MGSSHHHHHSSGLVPRG“ (+17 residues).

### 3. Supplementary Video

**Supplementary Video 1.** Three-dimensional view of the IpgC/IpaB complex SAXS model.

### 4. References

- Nguyen, V. S., Jobichen, C., Tan, K. W., Tan, Y. W., Chan, S. L., Ramesh, K., et al. (2015). Structure of AcrH-AopB Chaperone-Translocator Complex Reveals a Role for Membrane Hairpins in Type III Secretion System Translocon Assembly. *Structure* 23, 2022–2031. doi:10.1016/j.str.2015.08.014.
- Zimmermann, L., Stephens, A., Nam, S. Z., Rau, D., Kübler, J., Lozajic, M., et al. (2018). A Completely Reimplemented MPI Bioinformatics Toolkit with a New HHpred Server at its Core. *J. Mol. Biol.* 430, 2237–2243. doi:10.1016/j.jmb.2017.12.007.
